# Supplementary material for: Recovery of Cardiac Remodeling and Dysmetabolism by Pancreatic Islet Injury Improvement in Diabetic Rats after Yacon Leaf Extract Treatment
Source: Hindawi journal article supplement (doi:10.1155/2018/1821359), 2018-01-01
Supplement: f1 [file 1821359.f1.pdf]

357 *Supplementary Material*

358 **Table S1. Analysis of the islets by scores.** Description of the results for the islets staging  
 359 criteria (normal, slight, moderate and severe) obtained after the linear model for a binomial  
 360 distribution with logistic link followed by multiple Wald comparison test for islet size and  
 361 architecture.

|                     |                 | <b>C vs. DM</b> | <b>C vs. C+Y</b> | <b>C+Y vs. DM+Y</b> | <b>DM vs. DM+Y</b> |
|---------------------|-----------------|-----------------|------------------|---------------------|--------------------|
| <b>Size</b>         | <b>Normal</b>   | P < 0.001*      | ND or NT         | P < 0.001*          | P < 0.001*         |
|                     | <b>Slight</b>   | P = 0.0094*     | ND or NT         | ND or NT            | P < 0.001*         |
|                     | <b>Moderate</b> | P < 0.001*      | ND or NT         | ND or NT            | P = 0.025*         |
|                     | <b>Severe</b>   | ND or NT        | ND or NT         | ND or NT            | P = 0.0017*        |
| <b>Architecture</b> | <b>Normal</b>   | P < 0.001*      | ND or NT         | P < 0.001*          | P < 0.001*         |
|                     | <b>Slight</b>   | ND or NT        | ND or NT         | ND or NT            | P = 0.004*         |
|                     | <b>Moderate</b> | ND or NT        | ND or NT         | ND or NT            | P < 0.001*         |
|                     | <b>Severe</b>   | ND or NT        | ND or NT         | ND or NT            | ND or NT           |

362 C: Control; C+Y: Control treated with Yacon; DM: Diabetes Mellitus; DM+Y: Diabetes Mellitus  
 363 treated with Yacon; ND: No difference; NT: Not tested. The linear model for a binomial distribution  
 364 followed by multiple Wald comparison test analyzed statistical significance.

365

366

367

368

369

370

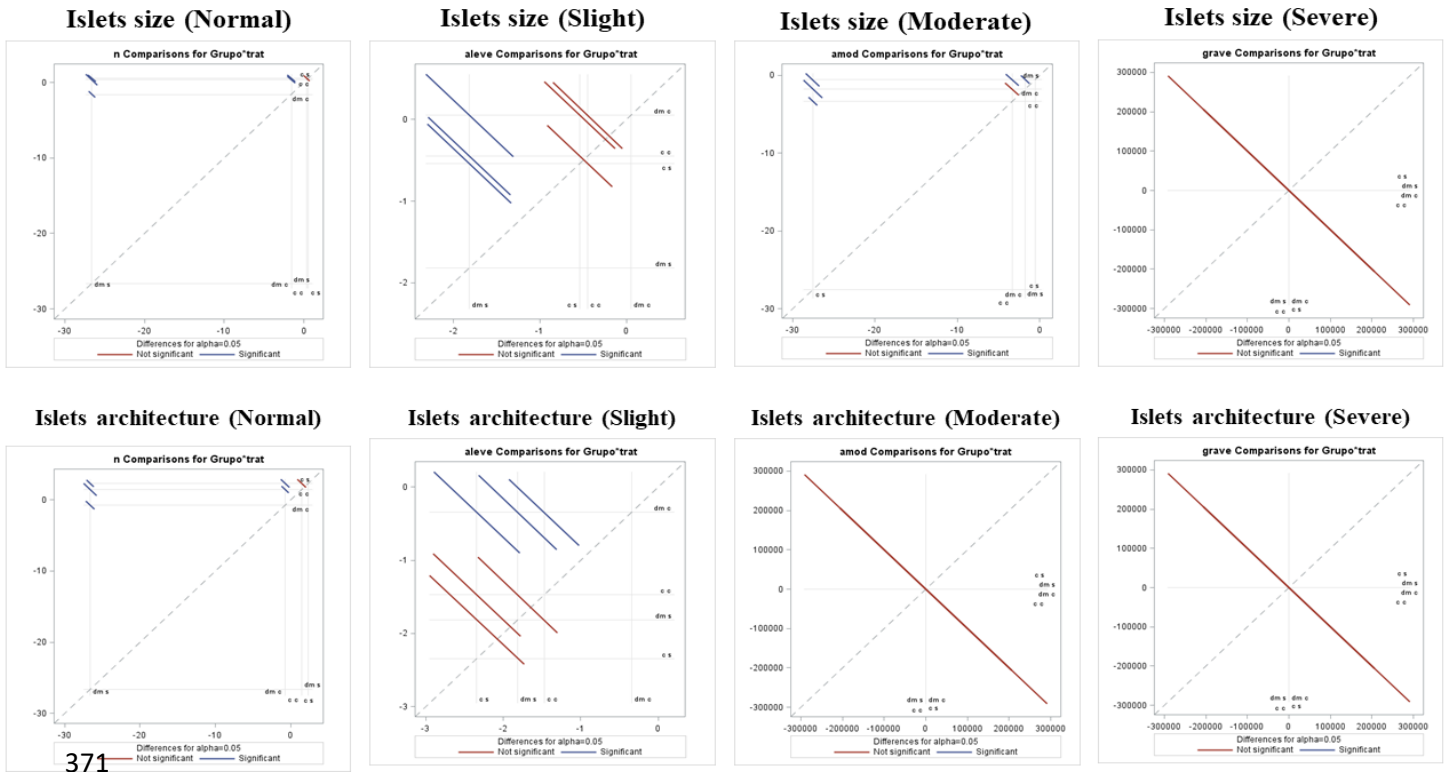

372 **Figure S1. Analysis of the islets by scores.** Description of the results for the islets staging  
 373 criteria (normal, slight, moderate and severe) obtained after the linear model for a binomial  
 374 distribution with logistic link followed by multiple Wald comparison test for islet size and  
 375 architecture. Blue lines represent statistical significance while red lines mean no difference  
 376 (ND) or not tested (NT) among the groups.

377

378

379

380

381

382

383

384

385

386
